# Supplementary material for: Spontaneous Regeneration of Human Photoreceptor Outer Segments
Source: PubMed Central journal article supplement (PMC4515765; doi:10.1038/srep12364), 2015-07-27
Supplement: srep12364-s1.pdf [file srep12364-s1.pdf]

**SUPPLEMENTARY FIGURES AND LEGENDS**

**FOR PAPER:**

**SPONTANEOUS REGENERATION OF HUMAN PHOTORECEPTOR  
OUTER SEGMENTS**

Jonathan C. Horton, Alicia B. Parker, James V. Botelho, Jacque L. Duncan

Beckman Vision Center  
University of California San Francisco  
San Francisco, California, 94143, USA

3- Dimensional Field View

mfERG Trace Array

Right Eye

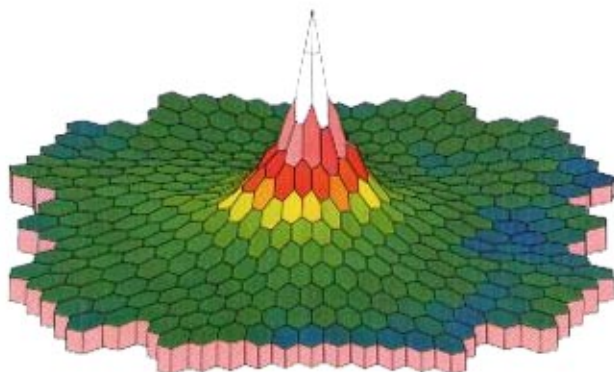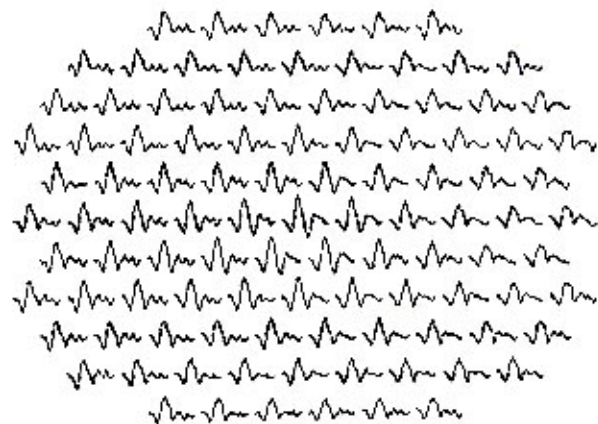

Left Eye

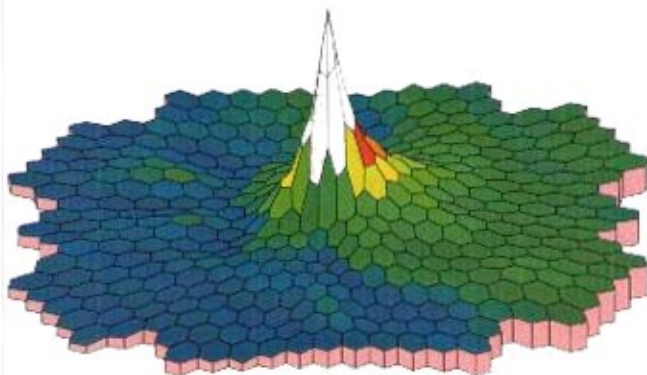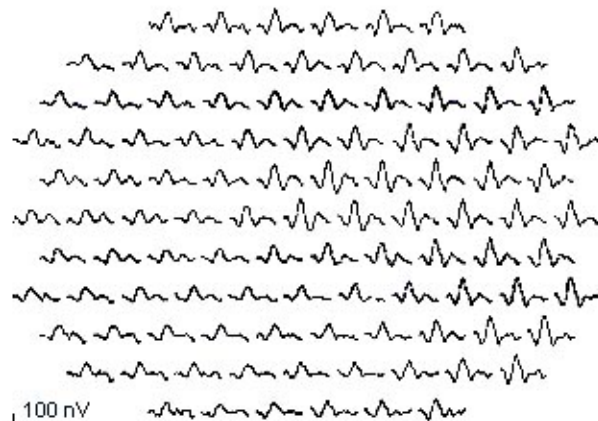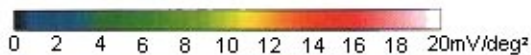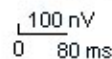

# Left Eye (2013)

Optic  
Disc

F

1°

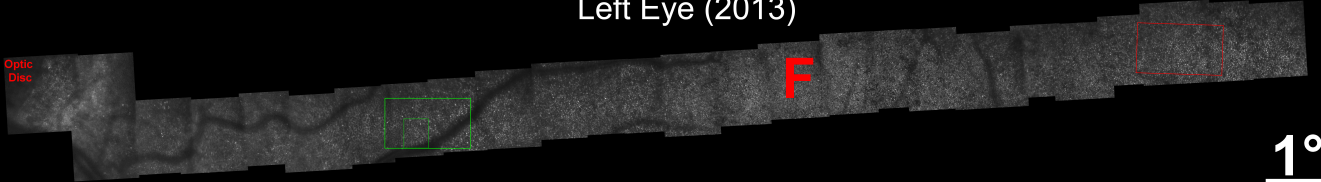

# A

# Initial Left Eye Visual Field - Central 30°

Fixation Monitor: Gaze/Blind Spot

Stimulus: III, White

Pupil Diameter: 6.5 mm

Date: 09-06-2013

Fixation Target: Central

Background: 31.5 ASB

Visual Acuity:

Time: 1:47 PM

Fixation Losses: 0/26

Strategy: Full Threshold

RX: DS DC X

False POS Errors: 1/19

False NEG Errors: 1/17

Test Duration: 16:20

Fovea: 36 dB

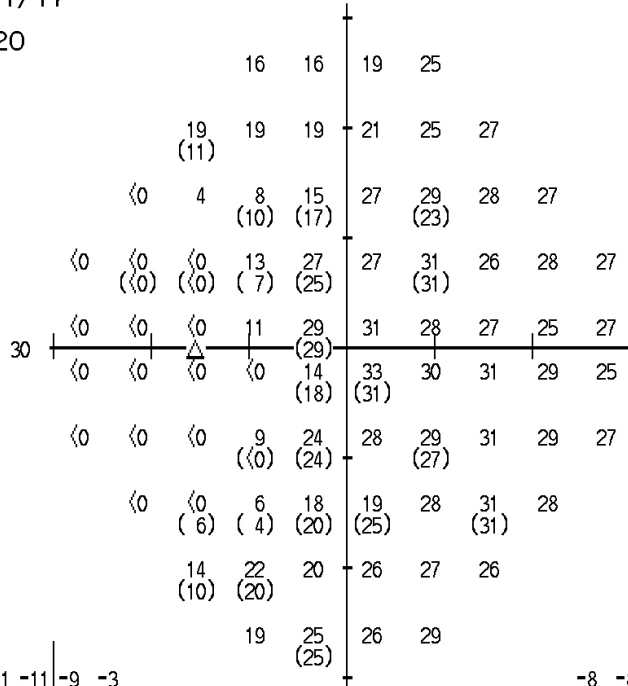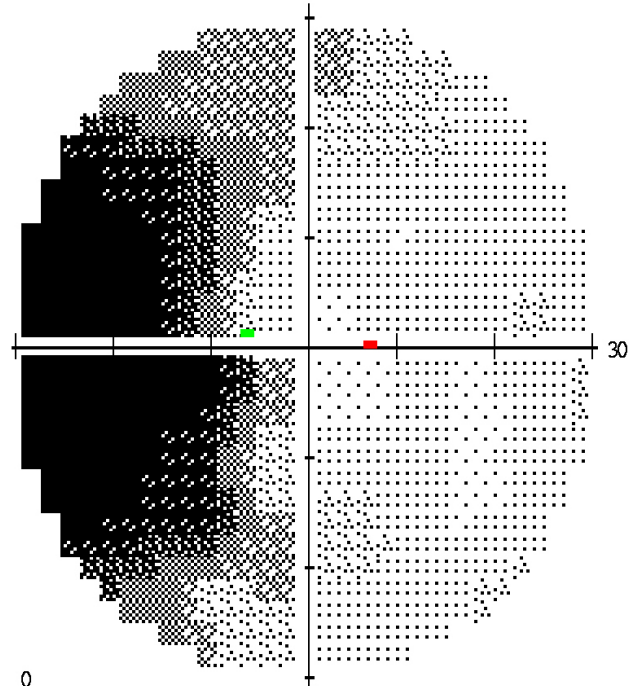

|     |     |     |     |     |    |    |    |    |    |
|-----|-----|-----|-----|-----|----|----|----|----|----|
| -11 | -11 | -9  | -3  |     |    |    |    |    |    |
| -14 | -10 | -10 | -9  | -5  | -2 |    |    |    |    |
| -33 | -27 | -22 | -15 | -4  | -5 | -3 | -3 |    |    |
| -33 | -34 | -34 | -22 | -7  | -6 | -2 | -6 | -3 | -2 |
| -34 | -34 | -22 | -5  | -3  | -6 | -6 | -3 |    |    |
| -35 | -35 | -35 | -18 | -2  | -4 | -2 | -3 | -5 |    |
| -34 | -35 | -35 | -30 | -9  | -6 | -6 | -2 | -3 | -3 |
| -34 | -31 | -28 | -14 | -11 | -4 | -1 | -3 |    |    |
| -20 | -11 | -12 | -5  | -4  | -5 |    |    |    |    |
| -12 | -6  | -4  | -1  |     |    |    |    |    |    |

|     |     |     |     |    |    |    |    |    |   |
|-----|-----|-----|-----|----|----|----|----|----|---|
| -8  | -8  | -6  | 0   |    |    |    |    |    |   |
| -11 | -7  | -7  | -6  | -2 | 1  |    |    |    |   |
| -30 | -24 | -19 | -12 | -1 | -2 | 0  | 0  |    |   |
| -30 | -31 | -31 | -19 | -4 | -3 | 1  | -3 | 0  | 1 |
| -32 | -32 | -19 | -2  | 0  | -3 | -3 | -3 | 0  |   |
| -32 | -32 | -33 | -15 | 1  | -1 | 1  | 0  | -2 |   |
| -31 | -32 | -32 | -27 | -6 | -3 | -3 | 1  | 0  | 0 |
| -31 | -28 | -25 | -11 | -8 | -1 | 2  | 0  |    |   |
| -17 | -8  | -9  | -3  | -1 | -2 |    |    |    |   |
| -9  | -3  | -1  | 2   |    |    |    |    |    |   |

GHT  
Outside normal limits

VFI 74%

MD -12.36 dB P < 0.5%

PSD 13.25 dB P < 0.5%

SF 2.52 dB P < 5%

CPSD 12.94 dB P < 0.5%

Total Deviation

Pattern Deviation

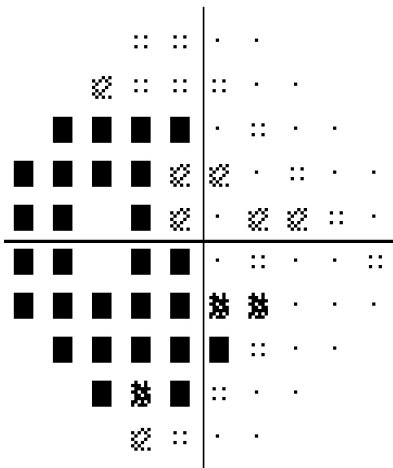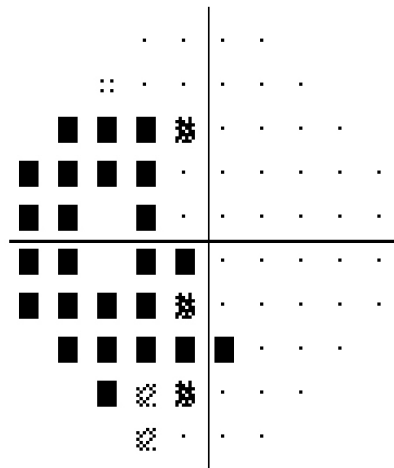

∴ < 5%  
 ⊗ < 2%  
 ⊠ < 1%  
 ■ < 0.5%

# B Initial Left Eye Visual Field - Peripheral 30 - 60°

Fixation Monitor: Gaze/Blind Spot

Stimulus: III, White

Pupil Diameter: 6.4 mm

Date: 09-06-2013

Fixation Target: Central

Background: 31.5 ASB

Visual Acuity:

Time: 2:45 PM

Fixation Losses: 0/12

Strategy: SITA-Fast

RX: DS DC X

False POS Errors: 0%

False NEG Errors: 0%

Test Duration: 04:11

Fovea: OFF

Threshold Graytone

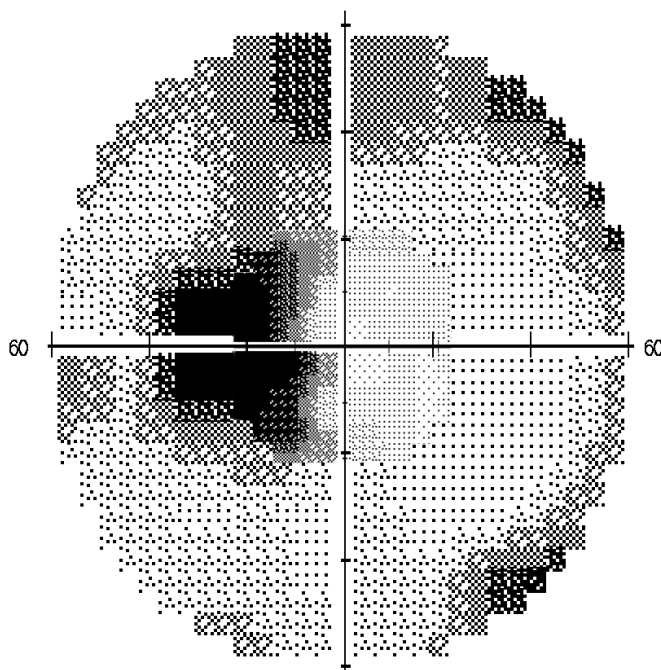

Defect Depth (dB)

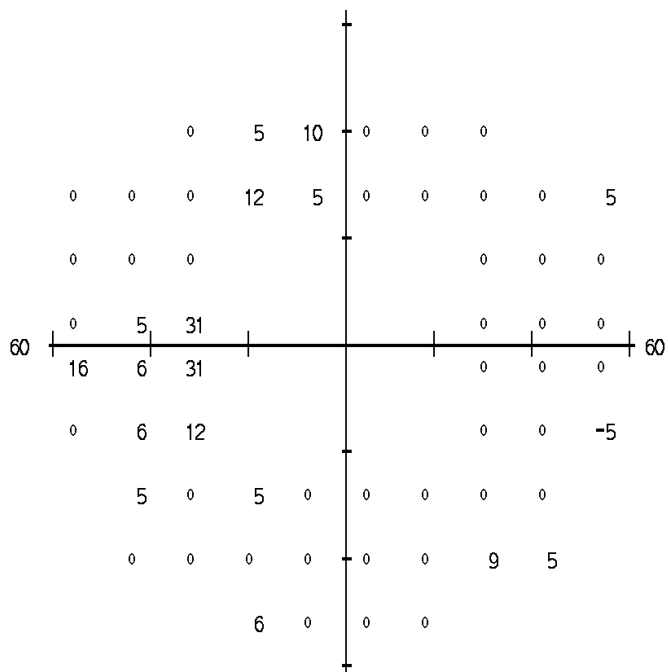

Threshold (dB)

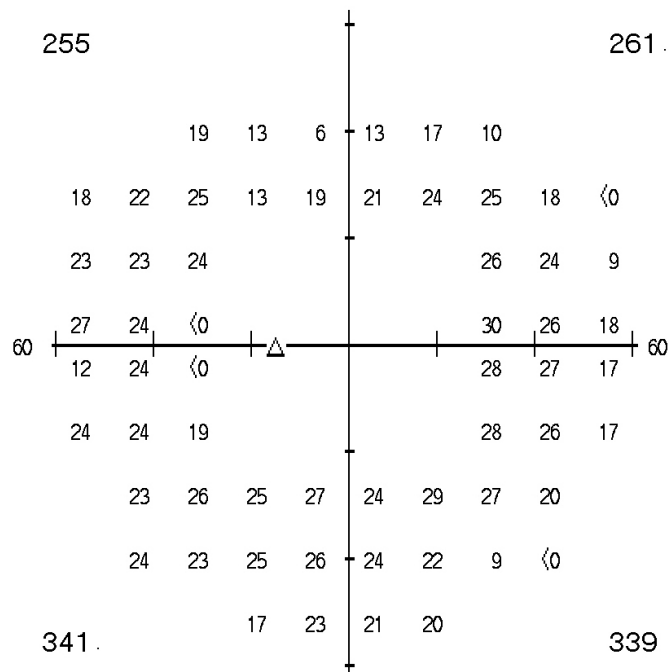

0 = Within 4 dB of Expected

Central Reference: 37 dB

# Initial Right Eye Visual Field - Central 30°

Fixation Monitor: Gaze/Blind Spot

Stimulus: III, White

Pupil Diameter: 6.6 mm

Date: 09-06-2013

Fixation Target: Central

Background: 31.5 ASB

Visual Acuity:

Time: 1:31 PM

Fixation Losses: 6/23 xx

Strategy: Full Threshold

RX: DS DC X

False POS Errors: 1/15

False NEG Errors: 0/14

Test Duration: 12:40

Fovea: 38 dB

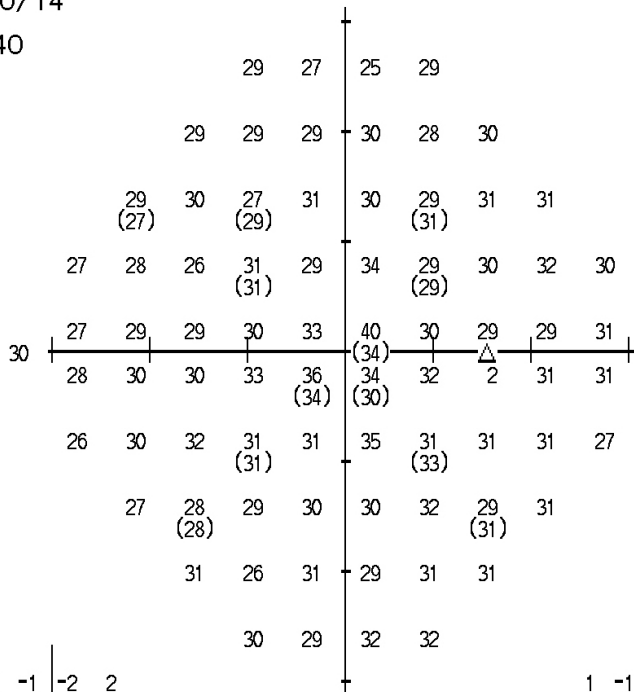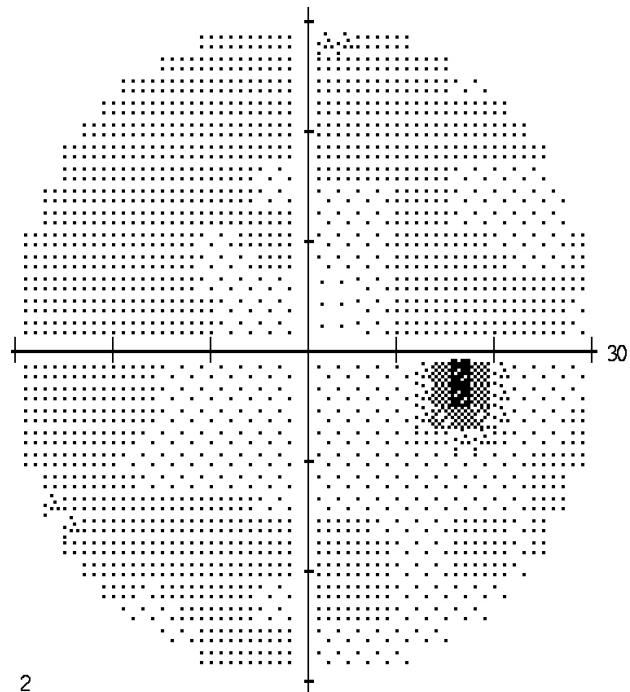

|  |    |    |    |    |    |    |    |    |    |    |  |  |  |  |
|--|----|----|----|----|----|----|----|----|----|----|--|--|--|--|
|  | 1  | -1 | -2 | 2  |    |    |    |    |    |    |  |  |  |  |
|  | 0  | -1 | -1 | 1  | -1 | 1  |    |    |    |    |  |  |  |  |
|  | -2 | -1 | -3 | 0  | -1 | -1 | 0  | 0  |    |    |  |  |  |  |
|  | -2 | -3 | -6 | -2 | -4 | 1  | -3 | -2 | 0  | -1 |  |  |  |  |
|  | -3 | -2 | -4 | -4 | -1 | 3  | -3 | -3 | -1 |    |  |  |  |  |
|  | -2 | -2 | -3 | -1 | 1  | -2 | -1 | -2 | -2 |    |  |  |  |  |
|  | -4 | -2 | -1 | -3 | -3 | 2  | -1 | -2 | -2 | -5 |  |  |  |  |
|  | -4 | -4 | -3 | -3 | -3 | -1 | -3 | -1 |    |    |  |  |  |  |
|  | 0  | -5 | 0  | -3 | -1 | -1 |    |    |    |    |  |  |  |  |
|  | 0  | -1 | 1  | 1  |    |    |    |    |    |    |  |  |  |  |

|  |  |    |    |    |    |    |    |    |    |    |    |  |  |  |
|--|--|----|----|----|----|----|----|----|----|----|----|--|--|--|
|  |  | 1  | -1 | -2 | 2  |    |    |    |    |    |    |  |  |  |
|  |  | 0  | -1 | -1 | 0  | -1 | 1  |    |    |    |    |  |  |  |
|  |  | -2 | -1 | -3 | 0  | -1 | -1 | 0  | 0  |    |    |  |  |  |
|  |  | -3 | -3 | -6 | -2 | -4 | 1  | -3 | -2 | 0  | -2 |  |  |  |
|  |  | -3 | -3 | -4 | -4 | -1 | 3  | -3 | -4 | -2 |    |  |  |  |
|  |  | -3 | -2 | -4 | -1 | 0  | -2 | -2 | -2 | -2 |    |  |  |  |
|  |  | -4 | -2 | -1 | -3 | -3 | 1  | -1 | -2 | -2 | -6 |  |  |  |
|  |  | -4 | -4 | -4 | -3 | -3 | -1 | -3 | -2 |    |    |  |  |  |
|  |  | 0  | -5 | -1 | -3 | -1 | -1 |    |    |    |    |  |  |  |
|  |  | 0  | -1 | 1  | 1  |    |    |    |    |    |    |  |  |  |

GHT  
Within normal limits

VFI 100%

MD -1.68 dB

PSD 2.08 dB

SF 1.37 dB

CPSD 1.38 dB

Total Deviation

Pattern Deviation

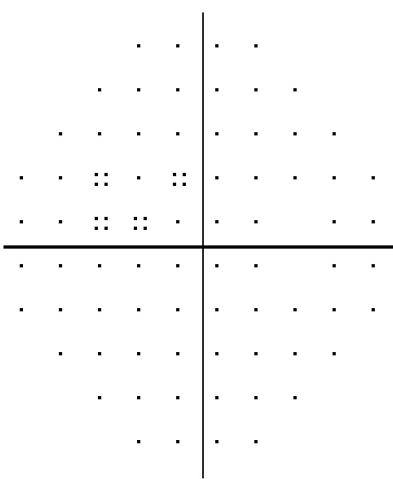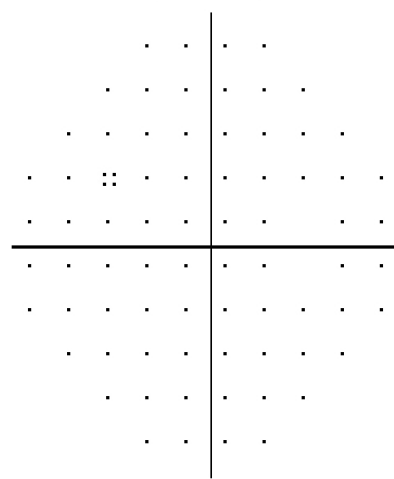

:: < 5%

▨ < 2%

▩ < 1%

■ < 0.5%

D

# Left Eye Visual Field - 3 Months Later

Fixation Monitor: Gaze/Blind Spot  
 Fixation Target: Central  
 Fixation Losses: 0/14  
 False POS Errors: 0 %  
 False NEG Errors: 5 %  
 Test Duration: 04:43  
 Fovea: 37 dB

Stimulus: III, White  
 Background: 31.5 ASB  
 Strategy: SITA-Fast

Pupil Diameter: 6.4 mm  
 Visual Acuity:  
 RX: DS DC X

Date: 12-11-2013  
 Time: 1:16 PM

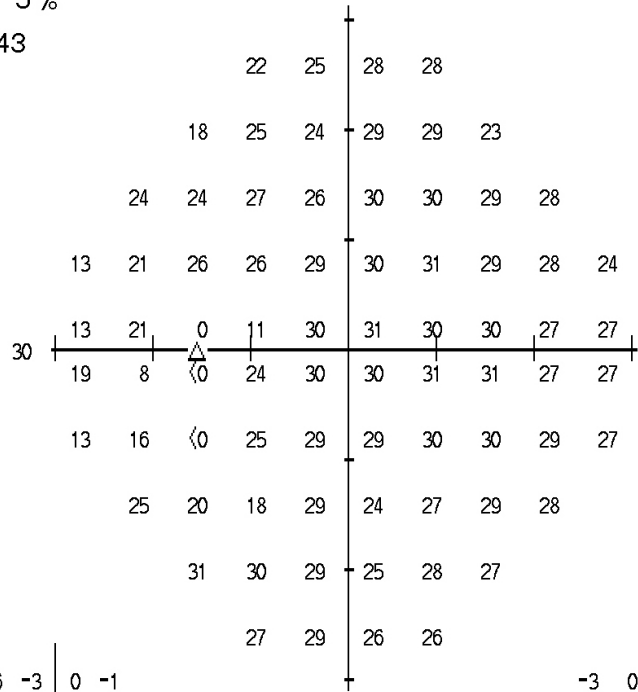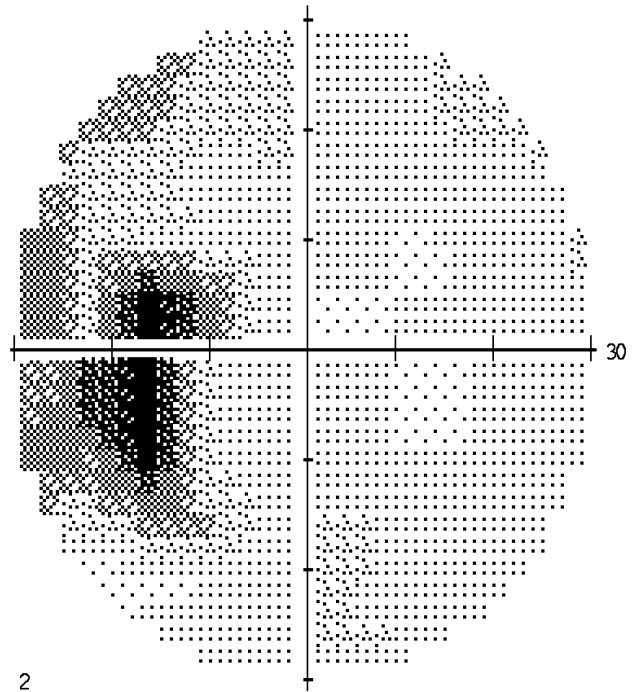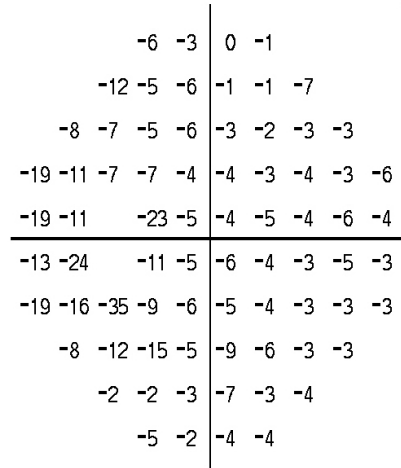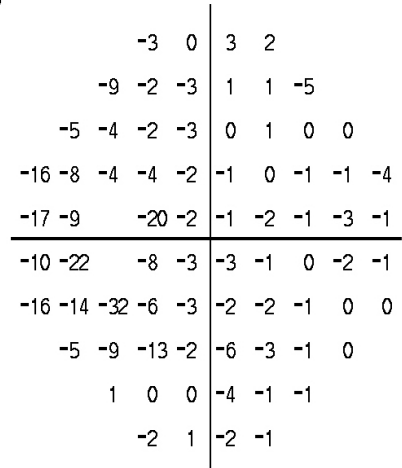

GHT  
 Outside normal limits  
 VFI 90%  
 MD -6.16 dB P < 1%  
 PSD 5.44 dB P < 0.5%

Total Deviation

Pattern Deviation

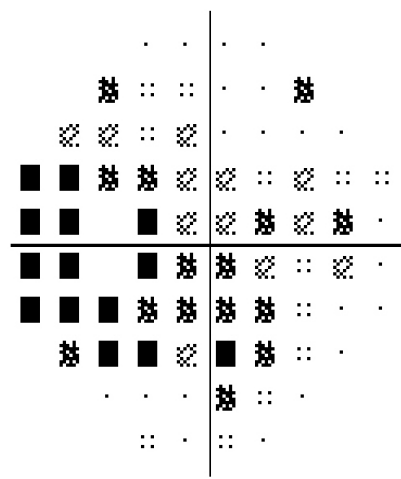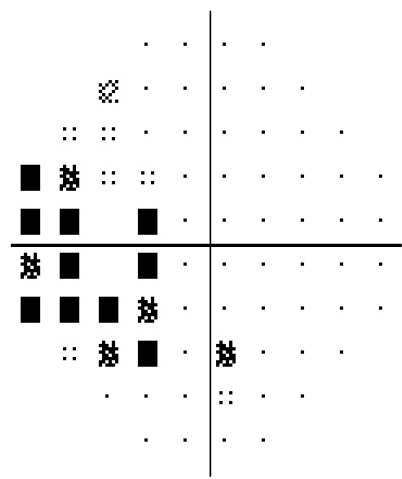

∴ < 5%  
 ▨ < 2%  
 ■ < 1%  
 ■ < 0.5%

# Left Eye Visual Field - 1 Year Later

FIXATION MONITOR: BLIND SPOT  
 FIXATION TARGET: CENTRAL  
 FIXATION LOSSES: 0/12  
 FALSE POS ERRORS: 0 %  
 FALSE NEG ERRORS: 0 %  
 TEST DURATION: 03:40

STIMULUS: III, WHITE  
 BACKGROUND: 31.5 ASB  
 STRATEGY: SITA-FAST

PUPIL DIAMETER:  
 VISUAL ACUITY:  
 RX: DS DC X

DATE: 08-19-2014  
 TIME: 1:19 PM

FOVEA: 39 DB

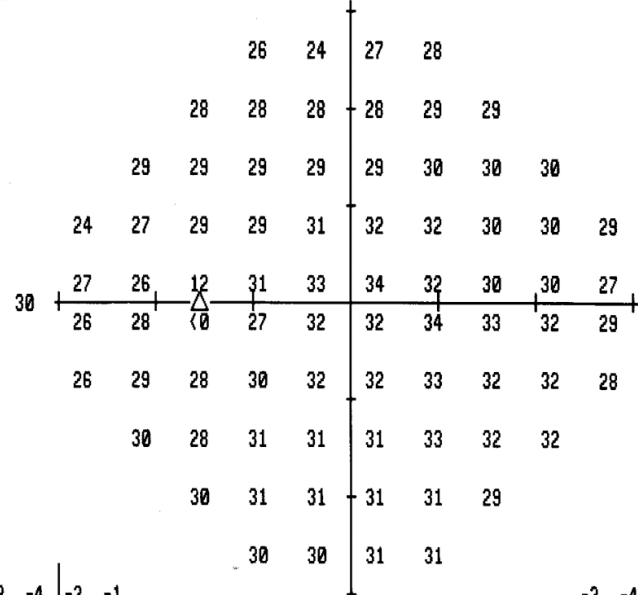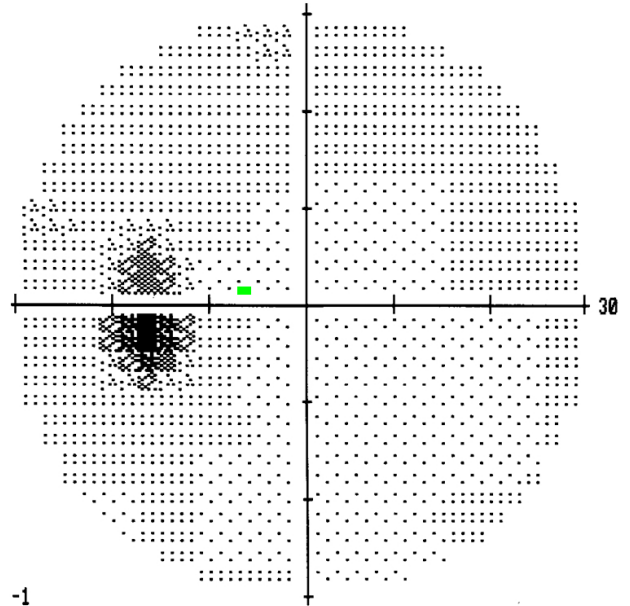

|  |  |    |    |    |    |    |    |    |    |    |    |  |
|--|--|----|----|----|----|----|----|----|----|----|----|--|
|  |  | -2 | -4 | -2 | -1 |    |    |    |    |    |    |  |
|  |  | -2 | -2 | -2 | -2 | -2 | -2 |    |    |    |    |  |
|  |  | -3 | -3 | -3 | -3 | -3 | -3 | -2 | -1 |    |    |  |
|  |  | -8 | -5 | -3 | -4 | -3 | -1 | -2 | -3 | -2 | -1 |  |
|  |  | -5 | -6 | -3 | -2 | -1 | -3 | -3 | -2 | -3 |    |  |
|  |  | -5 | -4 | -8 | -3 | -3 | -1 | 0  | 0  | -1 |    |  |
|  |  | -5 | -3 | -5 | -4 | -2 | -2 | -1 | -1 | 0  | -2 |  |
|  |  | -2 | -5 | -2 | -2 | -2 | 0  | 0  | 1  |    |    |  |
|  |  | -2 | -1 | -1 | 0  | 0  | -1 |    |    |    |    |  |
|  |  | -2 | -1 | 1  | 1  |    |    |    |    |    |    |  |

|  |  |  |  |    |    |    |    |    |    |    |    |    |    |
|--|--|--|--|----|----|----|----|----|----|----|----|----|----|
|  |  |  |  | -2 | -4 | -1 | -1 |    |    |    |    |    |    |
|  |  |  |  | -1 | -1 | -1 | -1 | -1 | -1 |    |    |    |    |
|  |  |  |  | -2 | -2 | -2 | -2 | -3 | -2 | -1 | -1 |    |    |
|  |  |  |  | -8 | -5 | -3 | -3 | -2 | -1 | -1 | -2 | -1 | 0  |
|  |  |  |  | -4 | -6 | -3 | -2 | -1 | -2 | -3 | -2 | -3 |    |
|  |  |  |  | -5 | -4 | -7 | -2 | -2 | -1 | 0  | 0  | -1 |    |
|  |  |  |  | -5 | -3 | -5 | -3 | -2 | -2 | 0  | -1 | 1  | -1 |
|  |  |  |  | -1 | -4 | -2 | -1 | -2 | 1  | 0  | 1  |    |    |
|  |  |  |  | -2 | -1 | 0  | 0  | 0  | 0  | -1 |    |    |    |
|  |  |  |  | -1 | 0  | 1  | 1  |    |    |    |    |    |    |

GHT  
 WITHIN NORMAL LIMITS

MD -2.19 DB P < 5%  
 PSD 1.86 DB

TOTAL  
 DEVIATION

PATTERN  
 DEVIATION

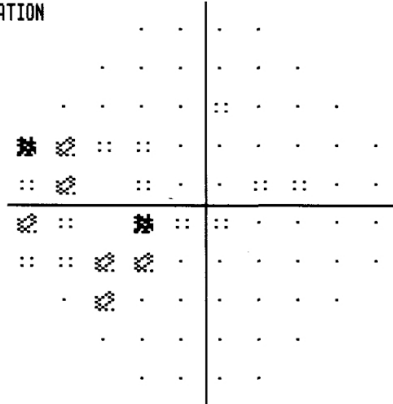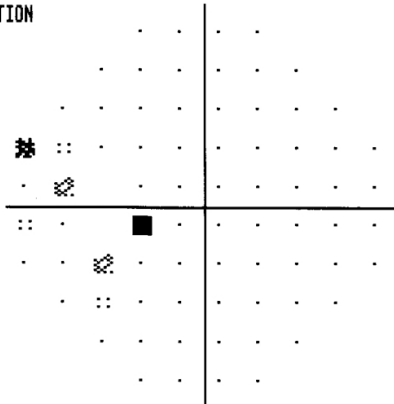

- :: < 5%
- ⊗ < 2%
- ⊗ < 1%
- < 0.5%



Left Eye (2014)

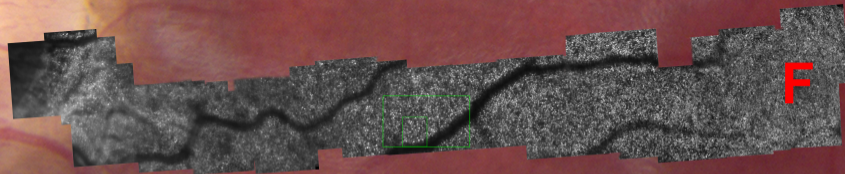

1°

# Right Eye (2013)

F

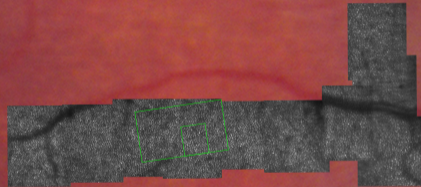

1°

# Right Eye (2014)

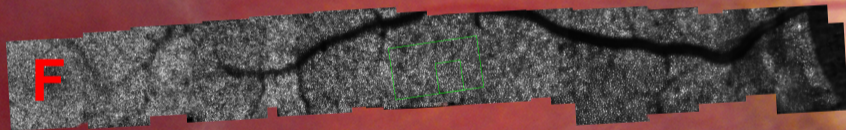

1°

## Supplementary Figure Legends

**Figure S1)** Multifocal electroretinogram (mfERG) shows reduced response density of traces from the nasal retina of the left eye, corresponding to the subject's visual field scotoma. The 3-dimensional plot shows a normal foveal peak, but diffuse depression beginning  $5^\circ$  from the center of gaze (blue tiles). The mfERG of the right eye is normal.

**Figure S2)** AOSLO montage from **Fig. 3**, showing the cone mosaic at higher resolution. Red rectangle appears in **Fig. 4**; green rectangle in **Fig. 5a**. F = fovea.

**Figure S3)** Full printouts of Humphrey visual field data, from which **Fig. 1** was derived. **(a)** Initial central  $30^\circ$  left eye visual field test showing a huge blind spot. Stimuli  $0.43^\circ$  in diameter are presented for 200 msec in random order at locations spaced every  $6^\circ$  within a hemispheric bowl against a background illumination of 31.5 apostilbs. Retinal sensitivity is determined using a full threshold strategy, reducing stimulus intensity by 4 dB increments until threshold is crossed, and then increasing intensity by 2 dB until threshold is recrossed. Numbers in grid at upper left are raw values in decibels (dB), signifying retinal sensitivity. A value of 0 dB indicates no response to the brightest spot (10,000 apostilbs) and a value of 40 dB indicates a response to a dim spot only 1 apostilb above the background. The grayscale representation at upper right is based on the numeric dB values, with black representing no response to the brightest spot. The green rectangle corresponds to the location in the visual field of the cone mosaic in **Fig. 5a**. The red rectangle corresponds to the location of in the visual field of the cone

mosaic in **Fig. 4**. Grids of negative numbers in middle of printout indicate the difference (dB) between the subject's thresholds and the expected thresholds for age-matched normal subjects. Pattern deviation plot is similar, but corrected for shift in overall field sensitivity. Green and red circles indicate defects at 3° and 9°, which straddle the location of green and red rectangles on grayscale map. The sampling grid of the perimeter is relatively coarse, so the border of the scotoma is not defined with precision. MD = mean deviation of tested points; PSD, SF, and CPSD indices are not relevant. **(b)** Initial peripheral 30-60° left eye visual field test, with the central 30° test from **(a)** inserted, showing that the scotoma in the left eye consists of an enormously enlarged blind spot. **(c)** Initial central 30° right eye test showing a normal visual field. Compare the blind spot with the blind spot in the left eye **(a)**. **(d)** Left eye visual field shows some recovery 3 months later. **(e)** Left eye visual field a year later is improved, but the deviation plots (below) reveal residual blind spot enlargement. Retinal sensitivity is nearly normal in the region that bordered the former scotoma (green rectangle).

**Figure S4)** AOSLO montage of cones in the left eye, obtained a year after the initial imaging, when the blind spot had shrunken back to a more normal size (**Fig. S3e**). Many new cone outer segments have appeared, presumably accounting for diminution in the subject's scotoma. The green rectangle marks the area shown in **Fig. 5c**. F = fovea.

**Figure S5)** AOSLO montage of cones from the fovea (F) to the optic disc in the unaffected right eye obtained at the same time as the montage of decimated cones in the left eye (**Fig. 3, Fig. S2**). The cone outer segments are normal in appearance and density. Region enclosed by the small

green rectangle is shown in **Fig. 8a, b**. Large green rectangle corresponds to the zone shown in **Fig. S6** in 2014.

**Figure S6)** AOSLO montage in the right eye, obtained a year after the montage in the right eye shown in **Fig. S5**. There is a normal population of outer segments, with no change in density between the two montages. Region enclosed by the green rectangle is shown in **Fig. 5e**.

## Supplemental Movie Legend

The movie compares the cone mosaic in **Fig. 7a** (2013 Left Retina) with the same region in **Fig. 7c** (2014 Left Retina). As the transition occurs back-and-forth between the two images, one can appreciate that about half of the empty cone profiles in 2013 become filled with bright outer segments in 2014.
